# Supplementary material for: Molecular Signature Expands the Landscape of Driver Negative Thyroid Cancers
Source: MDPI journal article supplement (doi:10.3390/cancers13205184), 2021-10-15
Supplement: s1 [file s1]

# Supplementary Materials: Molecular Signature Expands the Landscape of Driver Negative Thyroid Cancers

Larissa Valdemarin Bim, Thaise Nayane Ribeiro Carneiro, Vanessa Candiotti Buzatto, Gabriel Avelar Colozza-Gama, Fernanda C. Koyama, Debora Mota Dias Thomaz, Ana Carolina de Jesus Paniza, Eunjung Alice Lee, Pedro Alexandre Favoretto Galante and Janete Maria Cerutti

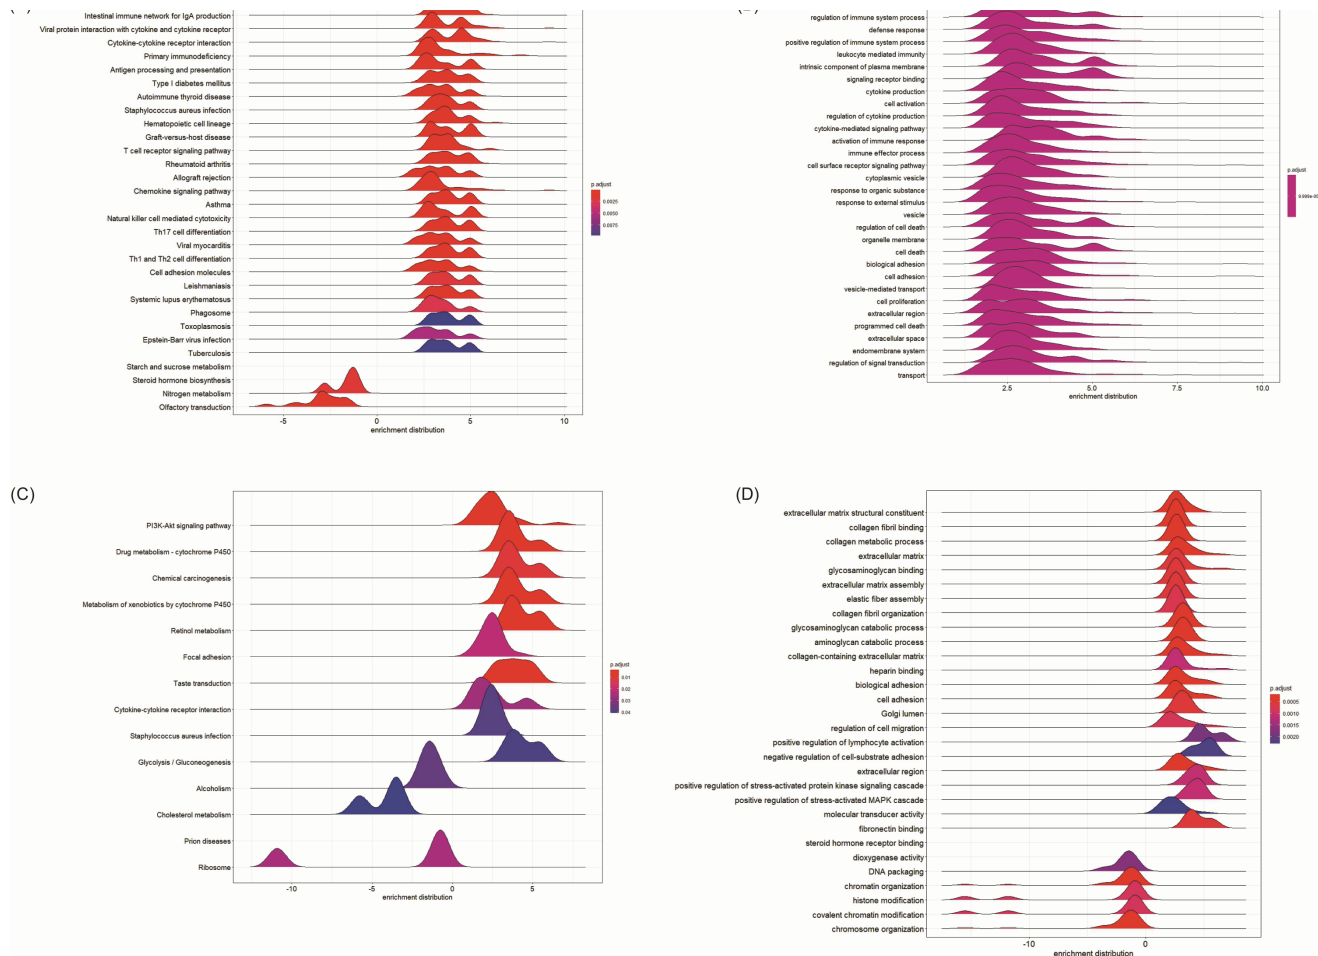

**Figure S1. Ridgeplot representing the most significantly enriched pathways by KEGG or GSEA enrichment analysis.** A. KEGG and B. GSEA pathway enrichment for DEGs between Negative BL and Negative RL groups; C. KEGG and D. GSEA pathway enrichment for DEGs between Negative RL and RAS/PAX8-PPAR $\gamma$  positive groups.

(A)

| Input Sample | B cells naive | B cells memory | Plasma cells | T cells CD8 | T cells CD4 naive | T cells CD4 memory resting | T cells CD4 memory activated | T cells follicular helper | T cells regulatory (Tregs) | T cells gamma delta | NK cells resting | NK cells activated | Monocytes | Macrophages M0 | Macrophages M1 | Macrophages M2 | Dendritic cells resting | Dendritic cells activated | Mast cells resting | Mast cells activated | Eosinophils | Neutrophils | P-value | Correlation | RMSE  | Absolute score (sig.score) |
|--------------|---------------|----------------|--------------|-------------|-------------------|----------------------------|------------------------------|---------------------------|----------------------------|---------------------|------------------|--------------------|-----------|----------------|----------------|----------------|-------------------------|---------------------------|--------------------|----------------------|-------------|-------------|---------|-------------|-------|----------------------------|
| BL_10        | 0.094         | 0.284          | 0.067        | 0           | 0                 | 0.632                      | 0                            | 0.109                     | 0                          | 0.049               | 0                | 0.108              | 0.016     | 0.171          | 0.129          | 0.484          | 0                       | 0                         | 0.066              | 0                    | 0.02        | 0           | 0.670   | 0.782       | 2.119 |                            |
| BL_3         | 0.22          | 0.135          | 0            | 0           | 0.085             | 0.531                      | 0.052                        | 0.111                     | 0                          | 0.029               | 0                | 0.043              | 0.014     | 0.107          | 0.08           | 0.197          | 0                       | 0                         | 0.072              | 0                    | 0           | 0           | 0.756   | 0.721       | 1.676 |                            |
| BL_8         | 0.329         | 0.072          | 0            | 0           | 0.01              | 0.628                      | 0.007                        | 0.172                     | 0                          | 0.011               | 0                | 0.12               | 0.036     | 0.149          | 0.077          | 0.187          | 0                       | 0.006                     | 0                  | 0.103                | 0.035       | 0           | 0.751   | 0.723       | 1.943 |                            |
| BL_23        | 0.253         | 0              | 0.011        | 0           | 0                 | 0.349                      | 0.032                        | 0.086                     | 0                          | 0.012               | 0                | 0.077              | 0.085     | 0.214          | 0.11           | 0.158          | 0                       | 0.012                     | 0                  | 0.116                | 0.023       | 0.003       | 0       | 0.534       | 0.852 | 1.541                      |
| B_11         | 0.063         | 0.061          | 0            | 0           | 0                 | 0.427                      | 0.031                        | 0.016                     | 0                          | 0                   | 0.099            | 0                  | 0.134     | 0.089          | 0              | 0.159          | 0.042                   | 0.071                     | 0.044              | 0                    | 0.062       | 0           | 0.002   | 0.312       | 0.954 | 1.176                      |
| B_12         | 0.325         | 0.039          | 0.04         | 0.135       | 0                 | 0.674                      | 0.029                        | 0.131                     | 0                          | 0.04                | 0                | 0.098              | 0.071     | 0.2            | 0.095          | 0.136          | 0                       | 0                         | 0.164              | 0.029                | 0           | 0           | 0.776   | 0.709       | 2.205 |                            |
| RL_1         | 0.068         | 0              | 0.004        | 0           | 0.007             | 0.138                      | 0                            | 0.067                     | 0                          | 0                   | 0.031            | 0.034              | 0.028     | 0.016          | 0.004          | 0.125          | 0.006                   | 0.022                     | 0.028              | 0                    | 0.015       | 0.003       | 0.003   | 0.256       | 0.978 | 0.600                      |
| RL_2         | 0.099         | 0              | 0            | 0           | 0                 | 0.146                      | 0                            | 0.05                      | 0.013                      | 0.02                | 0                | 0.041              | 0.035     | 0.137          | 0.013          | 0.193          | 0                       | 0                         | 0.058              | 0.018                | 0.004       | 0           | 0.531   | 0.853       | 0.826 |                            |
| RL_5         | 0.052         | 0              | 0.001        | 0           | 0.045             | 0.387                      | 0                            | 0.024                     | 0                          | 0.023               | 0.042            | 0.029              | 0.031     | 0.014          | 0.148          | 0              | 0.003                   | 0                         | 0.075              | 0.004                | 0           | 0           | 0.570   | 0.829       | 0.782 |                            |
| RL_9         | 0.153         | 0              | 0.013        | 0           | 0                 | 0.171                      | 0                            | 0.042                     | 0                          | 0                   | 0.055            | 0.048              | 0.035     | 0.033          | 0.007          | 0.08           | 0                       | 0.026                     | 0                  | 0.046                | 0.009       | 0.001       | 0.002   | 0.289       | 0.966 | 0.678                      |
| RL_13        | 0.025         | 0.017          | 0            | 0.014       | 0.018             | 0.166                      | 0                            | 0.021                     | 0                          | 0                   | 0.049            | 0.034              | 0.056     | 0.203          | 0.164          | 0.002          | 0.022                   | 0.024                     | 0.008              | 0.007                | 0           | 0           | 0.436   | 0.899       | 0.631 |                            |
| RL_27        | 0.043         | 0              | 0.003        | 0.011       | 0                 | 0.238                      | 0                            | 0.043                     | 0                          | 0                   | 0.084            | 0.053              | 0.04      | 0.061          | 0.008          | 0.166          | 0.003                   | 0.021                     | 0                  | 0.042                | 0.022       | 0.008       | 0       | 0.502       | 0.867 | 0.763                      |
| PL_6         | 0.114         | 0              | 0.005        | 0           | 0                 | 0.127                      | 0                            | 0.028                     | 0.004                      | 0                   | 0.065            | 0.019              | 0.03      | 0.051          | 0.001          | 0.144          | 0                       | 0.009                     | 0                  | 0.027                | 0.008       | 0.005       | 0.001   | 0.358       | 0.935 | 0.636                      |
| PL_7         | 0.046         | 0.015          | 0            | 0.019       | 0                 | 0.219                      | 0                            | 0.035                     | 0                          | 0                   | 0.044            | 0.037              | 0.025     | 0.008          | 0.143          | 0              | 0.014                   | 0                         | 0.066              | 0.018                | 0.009       | 0.001       | 0.335   | 0.946       | 0.697 |                            |
| PL_26        | 0.02          | 0.028          | 0            | 0           | 0                 | 0.081                      | 0                            | 0.045                     | 0.007                      | 0                   | 0.011            | 0.042              | 0.011     | 0.122          | 0.001          | 0.107          | 0.006                   | 0.023                     | 0                  | 0.06                 | 0.015       | 0.004       | 0       | 0.464       | 0.886 | 0.581                      |
| R_14         | 0.019         | 0.011          | 0.002        | 0           | 0.084             | 0.156                      | 0                            | 0.014                     | 0                          | 0                   | 0.01             | 0.034              | 0.023     | 0.18           | 0.005          | 0.136          | 0                       | 0.006                     | 0                  | 0.047                | 0           | 0           | 0       | 0.556       | 0.836 | 0.725                      |
| R_15         | 0.022         | 0.013          | 0.001        | 0           | 0.033             | 0.139                      | 0                            | 0.01                      | 0                          | 0                   | 0.023            | 0.02               | 0.013     | 0.196          | 0.006          | 0.199          | 0.002                   | 0.002                     | 0                  | 0.046                | 0.006       | 0           | 0       | 0.618       | 0.798 | 0.732                      |
| R_16         | 0.07          | 0              | 0.004        | 0.007       | 0                 | 0.066                      | 0                            | 0.065                     | 0.008                      | 0                   | 0.012            | 0.03               | 0.025     | 0.235          | 0              | 0.245          | 0.011                   | 0.019                     | 0                  | 0.042                | 0.004       | 0.003       | 0       | 0.592       | 0.813 | 0.844                      |
| R_17         | 0.06          | 0.052          | 0            | 0.005       | 0                 | 0.148                      | 0                            | 0.075                     | 0                          | 0                   | 0.054            | 0.045              | 0.072     | 0.003          | 0.168          | 0              | 0.013                   | 0.032                     | 0.038              | 0                    | 0.002       | 0           | 0.437   | 0.899       | 0.767 |                            |
| R_18         | 0.058         | 0.042          | 0            | 0.029       | 0                 | 0.115                      | 0                            | 0.055                     | 0                          | 0                   | 0.06             | 0.015              | 0.082     | 0.009          | 0.198          | 0              | 0.01                    | 0                         | 0.084              | 0.015                | 0.008       | 0.001       | 0.209   | 1.002       | 0.780 |                            |
| R_19         | 0.08          | 0              | 0            | 0.049       | 0                 | 0.208                      | 0.001                        | 0.125                     | 0                          | 0.003               | 0                | 0.055              | 0.028     | 0.074          | 0.065          | 0.131          | 0.001                   | 0.006                     | 0                  | 0.05                 | 0.005       | 0           | 0       | 0.501       | 0.867 | 0.881                      |
| R_20         | 0.048         | 0              | 0            | 0.013       | 0                 | 0.111                      | 0.008                        | 0.078                     | 0                          | 0.001               | 0                | 0.042              | 0.053     | 0              | 0.001          | 0.18           | 0.025                   | 0.035                     | 0                  | 0.084                | 0.02        | 0.009       | 0       | 0.367       | 0.930 | 0.708                      |
| R_21         | 0.045         | 0.019          | 0.002        | 0           | 0.009             | 0.102                      | 0                            | 0.044                     | 0.023                      | 0                   | 0.075            | 0.004              | 0.07      | 0.046          | 0.005          | 0.161          | 0.005                   | 0.01                      | 0.018              | 0.013                | 0.016       | 0           | 0.01    | 0.207       | 0.996 | 0.668                      |
| R_22         | 0.021         | 0.011          | 0.001        | 0           | 0.067             | 0.162                      | 0                            | 0.034                     | 0                          | 0                   | 0.006            | 0.036              | 0.019     | 0.177          | 0.005          | 0.096          | 0                       | 0.017                     | 0                  | 0.043                | 0           | 0           | 0       | 0.559       | 0.834 | 0.695                      |
| R_24         | 0.04          | 0.004          | 0.004        | 0.011       | 0.017             | 0.134                      | 0                            | 0.026                     | 0.001                      | 0                   | 0.047            | 0.016              | 0.027     | 0.063          | 0.008          | 0.088          | 0.002                   | 0.008                     | 0.019              | 0.015                | 0.014       | 0.002       | 0.003   | 0.238       | 0.986 | 0.544                      |
| R_25         | 0.05          | 0.019          | 0            | 0.013       | 0.009             | 0.08                       | 0                            | 0.031                     | 0.011                      | 0                   | 0.066            | 0                  | 0.031     | 0.1            | 0.005          | 0.118          | 0                       | 0.009                     | 0.017              | 0.013                | 0.005       | 0.004       | 0.003   | 0.238       | 0.986 | 0.582                      |
| 4            | 0.043         | 0.012          | 0            | 0           | 0.01              | 0.105                      | 0.005                        | 0.025                     | 0                          | 0                   | 0.035            | 0.009              | 0.021     | 0.124          | 0.005          | 0.135          | 0.006                   | 0.018                     | 0                  | 0.044                | 0.011       | 0.015       | 0.002   | 0.270       | 0.976 | 0.621                      |
| H_28         | 0.022         | 0.025          | 0            | 0.003       | 0                 | 0.108                      | 0                            | 0.03                      | 0.016                      | 0                   | 0.002            | 0.055              | 0.059     | 0.029          | 0.012          | 0.127          | 0                       | 0.009                     | 0                  | 0.076                | 0.02        | 0.004       | 0       | 0.398       | 0.917 | 0.594                      |
| H_29         | 0.029         | 0.02           | 0            | 0.007       | 0                 | 0.073                      | 0                            | 0.037                     | 0                          | 0                   | 0.044            | 0.068              | 0.031     | 0.001          | 0.112          | 0              | 0.021                   | 0                         | 0.078              | 0.035                | 0.008       | 0           | 0.424   | 0.905       | 0.565 |                            |
| H_30         | 0.045         | 0              | 0            | 0           | 0.002             | 0.173                      | 0                            | 0.048                     | 0                          | 0                   | 0                | 0.072              | 0.032     | 0.072          | 0.006          | 0.212          | 0                       | 0.013                     | 0                  | 0.097                | 0.013       | 0.003       | 0       | 0.641       | 0.792 | 0.790                      |

(B)

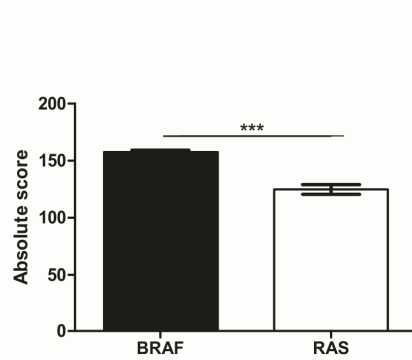

(C)

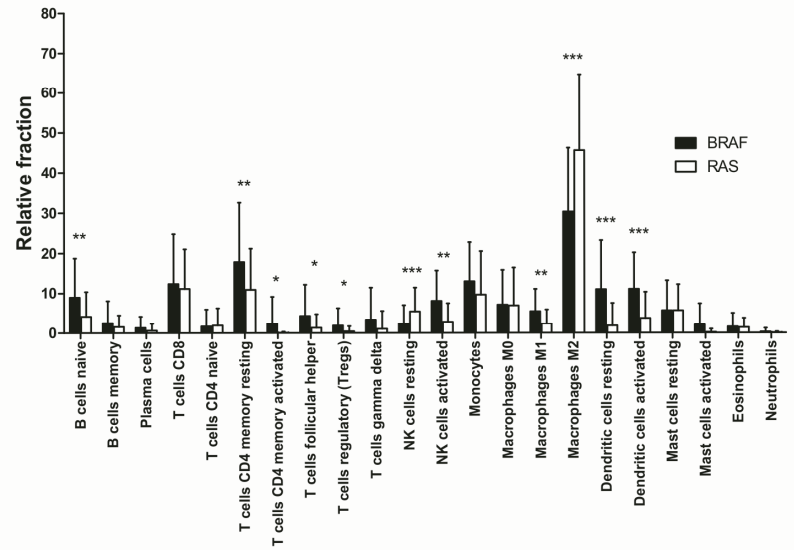

**Figure S2. A.** Heatmap representation of the fractions of each immune cell subtype in each sample obtained by CIBERSORTx software. The lower fractions have shades of blue and the higher have shades of red; **B.** Fractions of each immune cell subtype in TCGA-THCA's BRAF or RAS positive sample obtained by CIBERSORTx software. Black bars represent BRAF mutated samples and white bars represent RAS mutated samples; **C.** Absolute score generated by CIBERSORTx software representing the abundance of immune cells in TCGA-THCA's samples. The higher the score, the more presence of immune cells. The black bar represents BRAF mutated samples and the white bar represents RAS mutated samples.

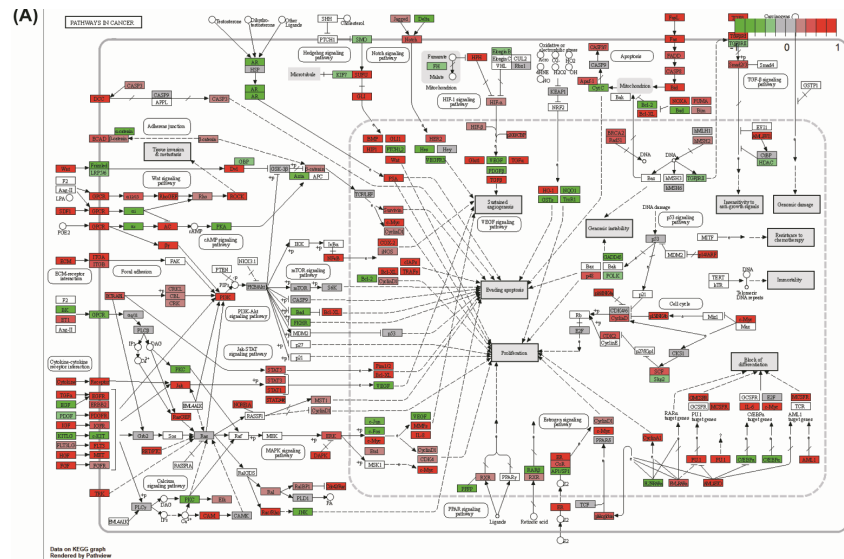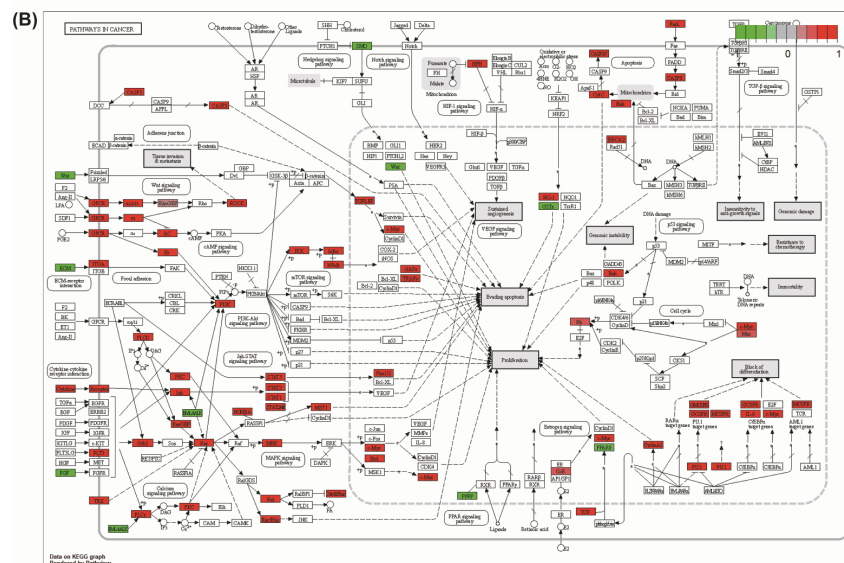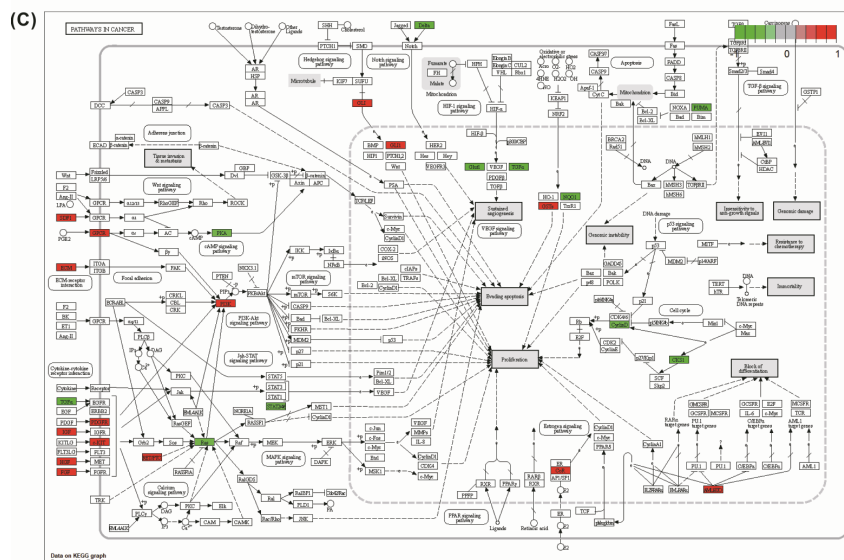

**Figure S3.** Kegg's 'Pathways in cancer' enriched pathway. Colored squares represent DEG detected in our differential expression analysis. Red boxes represent upregulated genes and green boxes represent downregulated genes, the degree of fold change is expressed in the upper-right legend; **A.** DEGs between TCGA-THCA *BRAF* and *RAS* positive samples; **B.** DEGs between negative BL and negative RL samples; **C.** DEGs between negative RL and RAS/PAX8-PPARg positive samples.
